# Supplementary material for: Estimating the Richness of a Population When the Maximum Number of Classes Is Fixed: A Nonparametric Solution to an Archaeological Problem
Source: PLoS One. 2012 May 29;7(5):e34179. doi: 10.1371/journal.pone.0034179 (PMC3362599; doi:10.1371/journal.pone.0034179)
Supplement: Table S1 — A spreadsheet for calculating doubly-bound confidence intervals. (XLSX) [file pone.0034179.s019.xlsx]

## Sheet: 工作表1
U
108	37	15	3	0.05
74.5	881.25
		p
3.62434	0.486533	0.819945	-2.04356	0.839646
LCL	UCL
46.0153	104.357
